# Supplementary material for: Associations between household air pollution and early child development among children aged 36–59 months in Bangladesh
Source: PubMed Central journal article supplement — J Epidemiol Community Health. 2022 Mar 24;76(7):667–76. doi: 10.1136/jech-2021-217554 (PMC9209676; doi:10.1136/jech-2021-217554), 2022-03-24
Supplement: jech-2021-217554supp001.pdf [file jech-2021-217554supp001.pdf]

## **Associations between household air pollution and early child development among 36 to 59 months old children in Bangladesh**

Juwel Rana<sup>1,2,3</sup>, Patricia Luna Gutierrez<sup>3</sup>, Syed Emdadul Haque<sup>4</sup>, José Ignacio Nazif-Muñoz<sup>5,6</sup>, Dipak K. Mitra<sup>2</sup>, and Youssef Oulhote<sup>7</sup>

<sup>1</sup>Department of Epidemiology, Biostatistics, and Occupational Health, Faculty of Medicine and Health Sciences, McGill University, Montreal, QC, Canada; <sup>2</sup>Department of Public Health, School of Health and Life Sciences, North South University, Bangladesh; <sup>3</sup>South Asian Institute for Social Transformation (SAIST), Dhaka, Bangladesh; <sup>4</sup>UChicago Research Bangladesh, University of Chicago, Chicago, USA; <sup>5</sup>Faculty of Medicine and Health Sciences, University of Sherbrooke, Longueuil, QC, Canada; <sup>6</sup>Department of Environmental Health, T. H Chan School of Public Health, Harvard University, Boston, MA, USA; <sup>7</sup>Department of Biostatistics and Epidemiology, School of Public Health & Health Sciences, University of Massachusetts Amherst, USA.

**Corresponding Author:** Juwel Rana, Department of Epidemiology, Biostatistics, and Occupational Health, Faculty of Medicine and Health Sciences, McGill University, Montreal, QC, Canada. Email: [juwelranasoc@gmail.com](mailto:juwelranasoc@gmail.com); [juwel.rana@mail.mcgill.ca](mailto:juwel.rana@mail.mcgill.ca)

## Supplementary Figure

**Figure S1: Regional variation in early childhood developmental delays**

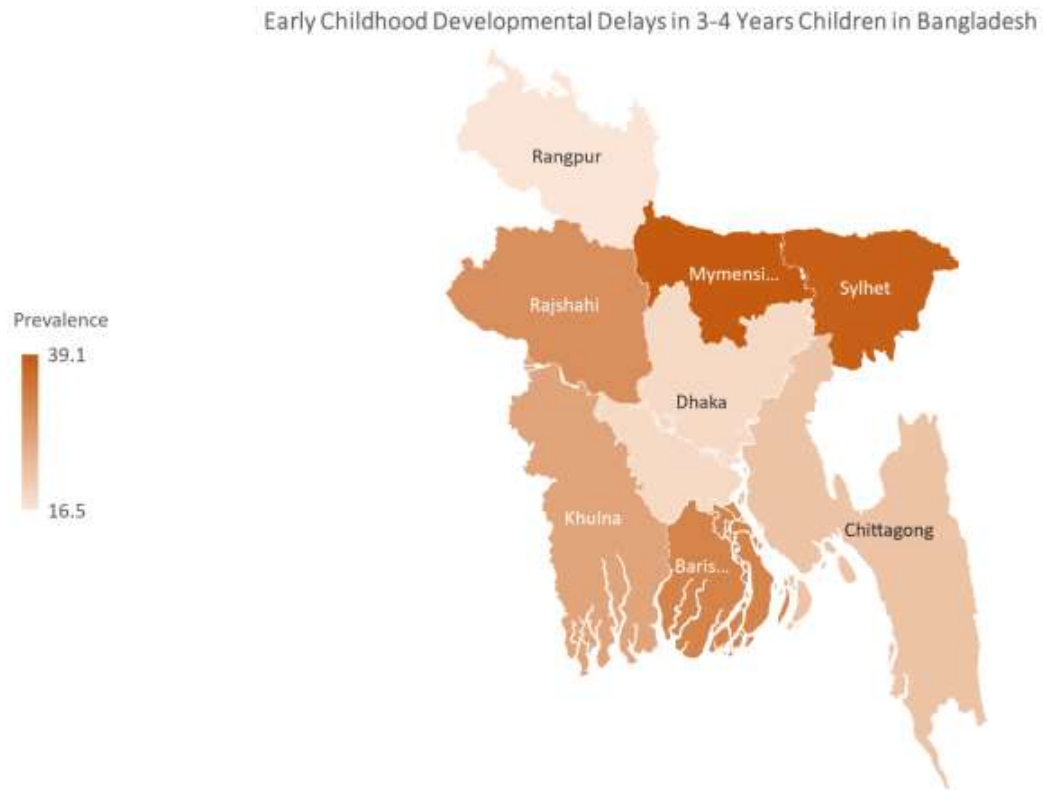

## Supplementary Tables

Table S1: Association between SFU and global ECDI stratified by sex of the children

| Predictors                                         | Overall<br>(Model I)           | Boy<br>(Model II)              | Girl<br>(Model III)            |
|----------------------------------------------------|--------------------------------|--------------------------------|--------------------------------|
|                                                    | Prevalence Ratios<br>(95 % CI) | Prevalence Ratios<br>(95 % CI) | Prevalence Ratios<br>(95 % CI) |
| <b>Unadjusted PRs (N=9395)</b>                     |                                |                                |                                |
| Solid Fuel Use (SFU)                               |                                |                                |                                |
| Exposed vs Unexposed                               | 1.66 (1.46, 1.89) ***          | 1.52 (1.30, 1.79) ***          | 1.93 (1.57, 2.38) ***          |
| <b><sup>a</sup>Adjusted PRs (N=9202)</b>           |                                |                                |                                |
| Solid Fuel Use (SFU)                               |                                |                                |                                |
| Exposed vs Unexposed                               | 1.47 (1.25, 1.73) ***          | 1.37 (1.13, 1.65) **           | 1.64 (1.31, 2.07) ***          |
| Sex of child                                       | (Ref=Boy)                      | (Ref=Boy)                      | (Ref=Girl)                     |
|                                                    | 0.76 (0.70, 0.83) ***          | 0.64 (0.50, 0.82) ***          | 1.55 (1.21, 1.98) ***          |
| Child age (in years)                               | 0.65 (0.60, 0.72) ***          | 0.66 (0.60, 0.72) ***          | 0.66 (0.60, 0.72) ***          |
| Ever attended ECE Program (Ref=No)                 |                                |                                |                                |
| Yes                                                | 0.66 (0.58, 0.76) ***          | 0.66 (0.58, 0.76) ***          | 0.66 (0.58, 0.76) ***          |
| Iodine Intake (Ref=No)                             |                                |                                |                                |
| Yes                                                | 0.96 (0.87, 1.06)              | 0.96 (0.87, 1.06)              | 0.96 (0.87, 1.06)              |
| Stunting (Ref=No)                                  |                                |                                |                                |
| Yes                                                | 1.09 (1.00, 1.20)              | 1.09 (1.00, 1.20)              | 1.09 (1.00, 1.20)              |
| Maternal Age                                       | 1.00 (0.99, 1.01)              | 1.00 (0.99, 1.01)              | 1.00 (0.99, 1.01)              |
| Maternal Education Level (Ref=Pre-primary or none) |                                |                                |                                |
| Primary                                            | 0.96 (0.84, 1.10)              | 0.96 (0.84, 1.10)              | 0.96 (0.84, 1.10)              |
| Secondary                                          | 0.79 (0.69, 0.91) **           | 0.79 (0.69, 0.91) **           | 0.79 (0.69, 0.91) **           |
| Higher Secondary+                                  | 0.68 (0.56, 0.82) ***          | 0.68 (0.56, 0.82) ***          | 0.68 (0.56, 0.82) ***          |
| Household Wealth Quintiles (Ref=Poorest)           |                                |                                |                                |
| Poorer                                             | 1.06 (0.93, 1.20)              | 1.06 (0.93, 1.20)              | 1.06 (0.93, 1.20)              |
| Middle                                             | 1.00 (0.88, 1.14)              | 1.00 (0.88, 1.14)              | 1.00 (0.88, 1.15)              |
| Richer                                             | 0.95 (0.82, 1.09)              | 0.95 (0.82, 1.09)              | 0.95 (0.82, 1.09)              |
| Richest                                            | 0.82 (0.69, 0.98) *            | 0.82 (0.69, 0.98) *            | 0.82 (0.69, 0.98) *            |
| Cooking Place (Ref=Main Room)                      |                                |                                |                                |
| Separate                                           | 0.90 (0.81, 1.00) *            | 0.90 (0.81, 1.00) *            | 0.90 (0.81, 1.00) *            |
| Outdoor                                            | 0.90 (0.80, 1.01)              | 0.90 (0.81, 1.01)              | 0.90 (0.80, 1.01)              |
| Urbanicity (Ref=Rural)                             |                                |                                |                                |
| Urban                                              | 1.10 (0.97, 1.25)              | 1.11 (0.98, 1.25)              | 1.11 (0.98, 1.25)              |
| Season (Ref=Winter)                                |                                |                                |                                |
| Summer                                             | 0.96 (0.88, 1.05)              | 0.96 (0.89, 1.05)              | 0.96 (0.89, 1.05)              |
| SFU*Sex                                            | -                              | <b>Ref=SFU*Girl</b>            | <b>Ref= SFU*Boy</b>            |
|                                                    |                                | 0.83 (0.64, 1.08)              | 1.20 (0.93, 1.56)              |

<sup>a</sup>Prevalence ratios (PRs) were adjusted for child age, ECE, iodine intake, stunting, maternal age, maternal education, household wealth index, cooking place, season, and urbanicity. \* p<0.05, \*\* p<0.01, \*\*\* p<0.001.

**Table S2: Association between SFU and global ECDI stratified by urbanicity**

| Predictors                                         | Overall<br>(Model I)           | Rural<br>(Model II)            | Urban<br>(Model III)           |
|----------------------------------------------------|--------------------------------|--------------------------------|--------------------------------|
|                                                    | Prevalence Ratios<br>(95 % CI) | Prevalence Ratios<br>(95 % CI) | Prevalence Ratios<br>(95 % CI) |
| <b>Unadjusted PRs(N=9395)</b>                      |                                |                                |                                |
| Solid Fuel Use (SFU)                               |                                |                                |                                |
| Exposed vs Unexposed                               | 1.66 (1.46, 1.89) ***          | 1.64 (1.63, 1.64)***           | 1.79 (1.78, 1.79) ***          |
| <b><sup>a</sup>Adjusted PRs(N=9202)</b>            |                                |                                |                                |
| Solid Fuel Use (SFU)                               |                                |                                |                                |
| Exposed vs Unexposed                               | 1.47 (1.25, 1.73) ***          | 1.40 (1.13, 1.74) **           | 1.54 (1.24, 1.91) ***          |
| Sex of child                                       | (Ref=Boy)                      | (Ref=Girl)                     | (Ref=Girls)                    |
|                                                    | 0.76 (0.70, 0.83) ***          | 1.32 (1.21, 1.43) ***          | 1.32 (1.21, 1.43) ***          |
| Child age (in years)                               | 0.65 (0.60, 0.72) ***          | 0.65 (0.60, 0.72) ***          | 0.66 (0.60, 0.72) ***          |
| Ever attended ECE Program (Ref=No)                 |                                |                                |                                |
| Yes                                                | 0.66 (0.58, 0.76) ***          | 0.66 (0.58, 0.76) ***          | 0.66 (0.58, 0.76) ***          |
| Iodine Intake (Ref=No)                             |                                |                                |                                |
| Yes                                                | 0.96 (0.87, 1.06)              | 0.96 (0.87, 1.06)              | 0.96 (0.87, 1.06)              |
| Stunting (Ref=No)                                  |                                |                                |                                |
| Yes                                                | 1.09 (1.00, 1.20)              | 1.09 (1.00, 1.20) *            | 1.10 (1.00, 1.20) *            |
| Maternal Age                                       | 1.00 (0.99, 1.01)              | 1.00 (0.99, 1.01)              | 1.00 (0.99, 1.01)              |
| Maternal Education Level (Ref=Pre-primary or none) |                                |                                |                                |
| Primary                                            | 0.96 (0.84, 1.10)              | 0.96 (0.84, 1.10)              | 0.96 (0.84, 1.10)              |
| Secondary                                          | 0.79 (0.69, 0.91) **           | 0.79 (0.69, 0.91) **           | 0.79 (0.69, 0.91) **           |
| Higher Secondary+                                  | 0.68 (0.56, 0.82) ***          | 0.68 (0.56, 0.82) ***          | 0.68 (0.56, 0.82) ***          |
| Household Wealth Quintiles (Ref=Poorest)           |                                |                                |                                |
| Poorer                                             | 1.06 (0.93, 1.20)              | 1.06 (0.93, 1.20)              | 1.06 (0.93, 1.20)              |
| Middle                                             | 1.00 (0.88, 1.14)              | 1.00 (0.88, 1.14)              | 1.00 (0.88, 1.14)              |
| Richer                                             | 0.95 (0.82, 1.09)              | 0.94 (0.82, 1.09)              | 0.94 (0.82, 1.09)              |
| Richest                                            | 0.82 (0.69, 0.98) *            | 0.82 (0.69, 0.98) *            | 0.82 (0.69, 0.98) *            |
| Cooking Place (Ref=Main Room)                      |                                |                                |                                |
| Separate                                           | 0.90 (0.81, 1.00) *            | 0.90 (0.81, 1.00) *            | 0.90 (0.81, 1.00) *            |
| Outdoor                                            | 0.90 (0.80, 1.01)              | 0.90 (0.80, 1.01)              | 0.90 (0.81, 1.01)              |
| Urbanicity (Ref=Rural)                             |                                |                                |                                |
| Urban                                              | 1.10 (0.97, 1.25)              | 1.03 (0.80, 1.32)              | 0.97 (0.76-1.25)               |
| Season (Ref=Winter)                                |                                |                                |                                |
| Summer                                             | 0.96 (0.88, 1.05)              | 0.96 (0.88, 1.05)              | 0.96 (0.89, 1.05)              |
| SFU*Urbanicity                                     | -                              | <b>Ref=SFU*Urban</b>           | <b>Ref= SFU*Rural</b>          |
|                                                    |                                | 0.91 (0.68, 1.21)              | 1.10 (0.83, 1.46)              |

<sup>a</sup>Prevalence ratios (PRs) were adjusted for child age and sex, ECE, iodine intake, stunting, maternal age, maternal education, household wealth index, cooking place, and season. \* p<0.05, \*\* p<0.01, \*\*\* p<0.001.

**Table S3: Association between SFU and learning-cognition stratified by sex of the children**

| Predictors                                         | Overall<br>(Model I)           | Boy<br>(Model II)              | Girl<br>(Model III)            |
|----------------------------------------------------|--------------------------------|--------------------------------|--------------------------------|
|                                                    | Prevalence Ratios<br>(95 % CI) | Prevalence Ratios<br>(95 % CI) | Prevalence Ratios<br>(95 % CI) |
| <b>Unadjusted PRs (N=9395)</b>                     |                                |                                |                                |
| Solid Fuel Use (SFU)                               |                                |                                |                                |
| Exposed vs Unexposed                               | 1.98 (1.50, 2.60)***           | 1.87 (1.35, 2.58) ***          | 2.18 (1.45, 3.28) ***          |
| <b>Adjusted PRs (N=9202)</b>                       |                                |                                |                                |
| Solid Fuel Use (SFU)                               |                                |                                |                                |
| Exposed vs Unexposed                               | 1.90 (1.39, 2.60) ***          | 1.86 (1.28, 2.70) **           | 2.05 (1.34, 3.11) **           |
| Sex of child                                       | (Ref=Boy)                      | (Ref=Boy)                      | (Ref=Girl)                     |
|                                                    | 0.92 (0.79, 1.06)              | 0.85 (0.54, 1.34)              | 1.17 (0.74, 1.85)              |
| Child age (in years)                               | 0.72 (0.61, 0.84) ***          | 0.72 (0.61, 0.84) ***          | 0.71 (0.61, 0.83) ***          |
| Ever attended ECE Program (Ref=No)                 |                                |                                |                                |
| Yes                                                | 0.61 (0.48, 0.79) ***          | 0.62 (0.48, 0.79) ***          | 0.64 (0.50, 0.82) ***          |
| Iodine Intake (Ref=No)                             |                                |                                |                                |
| Yes                                                | 1.17 (0.98, 1.41)              | 1.17 (0.97, 1.40)              | 1.18 (0.98, 1.41)              |
| Stunting (Ref=No)                                  |                                |                                |                                |
| Yes                                                | 1.10 (0.94, 1.29)              | 1.13 (0.96, 1.33)              | 1.11 (0.95, 1.30)              |
| Maternal Age                                       | 1.00 (0.99, 1.01)              | 1.00 (0.99, 1.01)              | 1.00 (0.99, 1.01)              |
| Maternal Education Level (Ref=Pre-primary or none) |                                |                                |                                |
| Primary                                            | 0.85 (0.67, 1.06)              | 0.84 (0.67, 1.06)              | 0.84 (0.67, 1.05)              |
| Secondary                                          | 0.66 (0.52, 0.84) **           | 0.67 (0.53, 0.84) **           | 0.65 (0.52, 0.83) ***          |
| Higher Secondary+                                  | 0.70 (0.50, 0.97) *            | 0.71 (0.51, 0.98) *            | 0.70 (0.50, 0.97) **           |
| Household Wealth Quintiles (Ref=Poorest)           |                                |                                |                                |
| Poorer                                             | 1.05 (0.84, 1.32)              | 1.01 (0.81, 1.26)              | 1.04 (0.83, 1.30)              |
| Middle                                             | 0.97 (0.76, 1.23)              | 0.92 (0.73, 1.17)              | 0.95 (0.75, 1.21)              |
| Richer                                             | 0.79 (0.60, 1.03)              | 0.75 (0.57, 0.98) *            | 0.78 (0.60, 1.01)              |
| Richest                                            | 0.81 (0.59, 1.10)              | 0.78 (0.57, 1.06)              | 0.81 (0.59, 1.10)              |
| Cooking Place (Ref= Main Room)                     |                                |                                |                                |
| Separate                                           | 0.82 (0.68, 1.00) *            | 0.81 (0.67, 0.98) *            | 0.83 (0.68, 1.00)              |
| Outdoor                                            | 0.82 (0.67, 1.01)              | 0.81 (0.66, 0.99) *            | 0.82 (0.67, 1.00)              |
| Urbanicity (Ref=Rural)                             |                                |                                |                                |
| Urban                                              | 1.12 (0.87, 1.43)              | 1.11 (0.87, 1.42)              | 1.13 (0.88, 1.44)              |
| Season (Ref= Winter)                               |                                |                                |                                |
| Summer                                             | 0.86 (0.73, 1.03)              | 0.87 (0.73, 1.04)              | 0.87 (0.73, 1.03)              |
| SFU*Sex                                            | -                              | <b>Ref= SFU*Girl</b>           | <b>Ref=SFU*Boy</b>             |
|                                                    |                                | 0.93 (0.57, 1.51)              | 1.08 (0.66, 1.75)              |

<sup>a</sup>Prevalence ratios (PRs) were adjusted for age of children, child age, ECE, iodine intake, stunting, maternal age, maternal education, household wealth index, cooking place, season, and urbanicity. \* p<0.05, \*\* p<0.01, \*\*\* p<0.001.

**Table S4: Association between SFU and learning-cognition stratified by urbanicity**

| Predictors                                         | Overall<br>(Model I)           | Rural<br>(Model II)            | Urban<br>(Model III)           |
|----------------------------------------------------|--------------------------------|--------------------------------|--------------------------------|
|                                                    | Prevalence Ratios<br>(95 % CI) | Prevalence Ratios<br>(95 % CI) | Prevalence Ratios<br>(95 % CI) |
| <b>Unadjusted PRs (N=9395)</b>                     |                                |                                |                                |
| Solid Fuel Use (SFU)                               |                                |                                |                                |
| Exposed vs Unexposed                               | 1.98 (1.50, 2.60)***           | 1.89 (1.26, 2.82)**            | 2.32 (1.52, 3.52)***           |
| <b><sup>a</sup>Adjusted PRs (N=9202)</b>           |                                |                                |                                |
| Solid Fuel Use (SFU)                               |                                |                                |                                |
| Exposed vs Unexposed                               | 1.90 (1.39, 2.60) ***          | 1.77 (1.16, 2.70) **           | 2.17 (1.43, 3.28) ***          |
| Sex of child                                       | (Ref=Boy)                      | (Ref=Girl)                     | (Ref=Girl)                     |
|                                                    | 0.92 (0.79, 1.06)              | 1.08 (0.93, 1.25)              | 1.09 (0.94, 1.26)              |
| Child age (in years)                               | 0.72 (0.61, 0.84) ***          | 0.71 (0.61, 0.83) ***          | 0.73 (0.62, 0.85) ***          |
| Ever attended ECE Program (Ref=No)                 |                                |                                |                                |
| Yes                                                | 0.61 (0.48, 0.79) ***          | 0.63 (0.49, 0.81) ***          | 0.61 (0.48, 0.79) ***          |
| Iodine Intake (Ref=No)                             |                                |                                |                                |
| Yes                                                | 1.17 (0.98, 1.41)              | 1.17 (0.98, 1.40)              | 1.17 (0.98, 1.40)              |
| Stunting (Ref=No)                                  |                                |                                |                                |
| Yes                                                | 1.10 (0.94, 1.29)              | 1.10 (0.94, 1.29)              | 1.10 (0.93, 1.29)              |
| Maternal Age                                       | 1.00 (0.99, 1.01)              | 1.00 (0.99, 1.01)              | 1.00 (0.99, 1.01)              |
| Maternal Education Level (Ref=Pre-primary or none) |                                |                                |                                |
| Primary                                            | 0.85 (0.67, 1.06)              | 0.83 (0.66, 1.04)              | 0.83 (0.66, 1.05)              |
| Secondary                                          | 0.66 (0.52, 0.84) **           | 0.64 (0.51, 0.82) ***          | 0.65 (0.52, 0.83) ***          |
| Higher Secondary+                                  | 0.70 (0.50, 0.97) *            | 0.69 (0.50, 0.96) *            | 0.70 (0.50, 0.97) *            |
| Household Wealth Quintiles (Ref=Poorest)           |                                |                                |                                |
| Poorer                                             | 1.05 (0.84, 1.32)              | 1.04 (0.83, 1.31)              | 1.02 (0.81, 1.27)              |
| Middle                                             | 0.97 (0.76, 1.23)              | 0.95 (0.75, 1.21)              | 0.93 (0.74, 1.19)              |
| Richer                                             | 0.79 (0.60, 1.03)              | 0.78 (0.60, 1.02)              | 0.75 (0.58, 0.98) *            |
| Richest                                            | 0.81 (0.59, 1.10)              | 0.81 (0.60, 1.11)              | 0.79 (0.58, 1.08)              |
| Cooking Place (Ref= Main Room)                     |                                |                                |                                |
| Separate                                           | 0.82 (0.68, 1.00) *            | 0.83 (0.68, 1.00)              | 0.81 (0.67, 0.99) *            |
| Outdoor                                            | 0.82 (0.67, 1.01)              | 0.82 (0.67, 1.01)              | 0.81 (0.66, 0.99) *            |
| Urbanicity (Ref=Rural)                             |                                |                                |                                |
| Urban                                              | 1.12 (0.87, 1.43)              | 0.97 (0.59,1.60)               | 1.05 (0.63, 1.73)              |
| Season (Ref= Winter)                               |                                |                                |                                |
| Summer                                             | 0.86 (0.73, 1.03)              | 0.87 (0.73, 1.03)              | 0.86 (0.73, 1.02)              |
| SFU*Urbanicity                                     | -                              | <b>Ref=SFU*Urban</b>           | <b>Ref= SFU*Rural</b>          |
|                                                    |                                | 0.81 (0.46, 1.41)              | 1.21 (0.69, 2.11)              |

<sup>a</sup>Prevalence ratios (PRs) were adjusted for child age and sex, ECE, iodine intake, stunting, maternal age, maternal education, household wealth index, cooking place, and season. \* p<0.05, \*\* p<0.01, \*\*\* p<0.001.

**Table S5: Association between SFU and socio-emotional stratified by sex of the children**

| Predictors                                         | Overall<br>(Model I)           | Boy<br>(Model II)              | Girl<br>(Model III)            |
|----------------------------------------------------|--------------------------------|--------------------------------|--------------------------------|
|                                                    | Prevalence Ratios<br>(95 % CI) | Prevalence Ratios<br>(95 % CI) | Prevalence Ratios<br>(95 % CI) |
| <b>Unadjusted PRs (N=9395)</b>                     |                                |                                |                                |
| Solid Fuel Use (SFU)                               |                                |                                |                                |
| Exposed vs Unexposed                               | 1.22 (1.09, 1.37) **           | 1.22 (1.06, 1.41) **           | 1.23 (1.03, 1.46) **           |
| <b><sup>a</sup>Adjusted PRs (N=9202)</b>           |                                |                                |                                |
| Solid Fuel Use (SFU)                               |                                |                                |                                |
| Exposed vs Unexposed                               | 1.17 (1.01, 1.36) *            | 1.18 (0.99, 1.40)              | 1.16 (0.96, 1.42)              |
| Sex of child                                       | (Ref=Boy)                      | (Ref=Boy)                      | (Ref=Girl)                     |
|                                                    | 0.75 (0.69, 0.82) ***          | 0.76 (0.62, 0.93) *            | 1.31 (1.07, 1.61) **           |
| Child age (in years)                               | 0.86 (0.79, 0.94) **           | 0.86 (0.79, 0.94) ***          | 0.86 (0.79, 0.94) **           |
| Ever attended ECE Program (Ref=No)                 |                                |                                |                                |
| Yes                                                | 1.05 (0.94, 1.17)              | 1.05 (0.94, 1.17)              | 1.05 (0.94, 1.17)              |
| Iodine Intake (Ref=No)                             |                                |                                |                                |
| Yes                                                | 1.00 (0.91, 1.10)              | 1.00 (0.91, 1.10)              | 1.00 (0.91, 1.10)              |
| Stunting (Ref=No)                                  |                                |                                |                                |
| Yes                                                | 1.03 (0.94, 1.13)              | 1.03 (0.94, 1.13)              | 1.03 (0.94, 1.13)              |
| Maternal Age                                       | 1.00 (0.99, 1.01)              | 1.00 (0.99, 1.01)              | 1.00 (0.99, 1.01)              |
| Maternal Education Level (Ref=Pre-primary or none) |                                |                                |                                |
| Primary                                            | 0.97 (0.84, 1.12)              | 0.97 (0.85, 1.12)              | 0.97 (0.85, 1.12)              |
| Secondary                                          | 0.94 (0.82, 1.08)              | 0.95 (0.82, 1.09)              | 0.95 (0.82, 1.09)              |
| Higher Secondary+                                  | 0.91 (0.76, 1.08)              | 0.91 (0.76, 1.09)              | 0.91 (0.76, 1.09)              |
| Household Wealth Quintiles (Ref=Poorest)           |                                |                                |                                |
| Poorer                                             | 1.07 (0.94, 1.23)              | 1.08 (0.94, 1.23)              | 1.08 (0.94, 1.23)              |
| Middle                                             | 1.14 (1.00, 1.31) *            | 1.14 (1.00, 1.31)              | 1.14 (1.00, 1.31)              |
| Richer                                             | 1.07 (0.93, 1.24)              | 1.07 (0.93, 1.23)              | 1.07 (0.93, 1.23)              |
| Richest                                            | 0.94 (0.79, 1.11)              | 0.93 (0.79, 1.10)              | 0.93 (0.79, 1.11)              |
| Cooking Place (Ref= Main Room)                     |                                |                                |                                |
| Separate                                           | 1.01 (0.91, 1.12)              | 1.01 (0.91, 1.12)              | 1.01 (0.91, 1.12)              |
| Outdoor                                            | 0.96 (0.85, 1.07)              | 0.96 (0.85, 1.07)              | 0.96 (0.86, 1.07)              |
| Urbanicity (Ref=Rural)                             |                                |                                |                                |
| Urban                                              | 1.05 (0.93, 1.19)              | 1.05 (0.93, 1.19)              | 1.05 (0.93, 1.19)              |
| Season (Ref= Winter)                               |                                |                                |                                |
| Summer                                             | 0.97 (0.89, 1.06)              | 0.97 (0.89, 1.06)              | 0.97 (0.89, 1.06)              |
| SFU*Sex                                            | -                              | <b>Ref=SFU*Girl</b>            | <b>Ref= SFU*Boy</b>            |
|                                                    |                                | 1.01 (0.81, 1.27)              | 0.99 (0.79, 1.23)              |

<sup>a</sup>Prevalence ratios (PRs) were adjusted for child age, ECE, iodine intake, stunting, maternal age, maternal education, household wealth index, cooking place, season, and urbanicity. \* p<0.05, \*\* p<0.01, \*\*\* p<0.001.

**Table S6: Association between SFU and socio-emotional stratified by urbanicity**

| Predictors                                         | Overall<br>(Model I)           | Rural<br>(Model II)            | Urban<br>(Model III)           |
|----------------------------------------------------|--------------------------------|--------------------------------|--------------------------------|
|                                                    | Prevalence Ratios<br>(95 % CI) | Prevalence Ratios<br>(95 % CI) | Prevalence Ratios<br>(95 % CI) |
| <b>Unadjusted PRs(N=9395)</b>                      |                                |                                |                                |
| Solid Fuel Use (SFU)                               |                                |                                |                                |
| Exposed vs Unexposed                               | 1.22 (1.09, 1.37) **           | 1.33 (1.11,1.60)**             | 1.16 (0.97, 1.39)              |
| <b><sup>a</sup>Adjusted PRs(N=9202)</b>            |                                |                                |                                |
| Solid Fuel Use (SFU)                               |                                |                                |                                |
| Exposed vs Unexposed                               | 1.17 (1.01, 1.36) *            | 1.12 (0.93, 1.35)              | 1.24 (1.23, 1.24) ***          |
| Sex of child                                       | (Ref=Boy)                      | (Ref=Girl)                     | (Ref=Girl)                     |
|                                                    | 0.75 (0.69, 0.82) ***          | 1.33 (1.23, 1.44) ***          | 1.33 (1.33, 1.33) ***          |
| Child age (in years)                               | 0.86 (0.79, 0.94) **           | 0.86 (0.79, 0.94) ***          | 0.86 (0.86, 0.86) ***          |
| Ever attended ECE Program (Ref=No)                 |                                |                                |                                |
| Yes                                                | 1.05 (0.94, 1.17)              | 1.05 (0.94, 1.18)              | 1.05 (1.05, 1.05) ***          |
| Iodine Intake (Ref=No)                             |                                |                                |                                |
| Yes                                                | 1.00 (0.91, 1.10)              | 1.00 (0.91, 1.10)              | 1.00 (1.00, 1.00)              |
| Stunting (Ref=No)                                  |                                |                                |                                |
| Yes                                                | 1.03 (0.94, 1.13)              | 1.03 (0.94, 1.13)              | 1.03 (1.03, 1.03) ***          |
| Maternal Age                                       | 1.00 (0.99, 1.01)              | 1.00 (0.99, 1.01)              | 1.00 (1.00, 1.00)              |
| Maternal Education Level (Ref=Pre-primary or none) |                                |                                |                                |
| Primary                                            | 0.97 (0.84, 1.12)              | 0.97 (0.85, 1.12)              | 0.97 (0.97, 0.97) ***          |
| Secondary                                          | 0.94 (0.82, 1.08)              | 0.95 (0.85, 1.09)              | 0.94 (0.94, 0.95) ***          |
| Higher Secondary+                                  | 0.91 (0.76, 1.08)              | 0.91 (0.76, 1.09)              | 0.91 (0.91, 0.91) ***          |
| Household Wealth Quintiles (Ref=Poorest)           |                                |                                |                                |
| Poorer                                             | 1.07 (0.94, 1.23)              | 1.07 (0.94, 1.23)              | 1.08 (1.08, 1.08) ***          |
| Middle                                             | 1.14 (1.00, 1.31) *            | 1.14 (1.00, 1.31)              | 1.15 (1.15, 1.15) ***          |
| Richer                                             | 1.07 (0.93, 1.24)              | 1.07 (0.92, 1.23)              | 1.07 (1.07, 1.07) ***          |
| Richest                                            | 0.94 (0.79, 1.11)              | 0.94 (0.79, 1.11)              | 0.94 (0.94, 0.94) ***          |
| Cooking Place (Ref=Main Room)                      |                                |                                |                                |
| Separate                                           | 1.01 (0.91, 1.12)              | 1.01 (0.91, 1.12)              | 1.01 (1.01, 1.01) ***          |
| Outdoor                                            | 0.96 (0.85, 1.07)              | 0.96 (0.86, 1.07)              | 0.95 (0.95, 0.95) ***          |
| Urbanicity (Ref=Rural)                             |                                |                                |                                |
| Urban                                              | 1.05 (0.93, 1.19)              | 0.98 (0.79, 1.22)              | 1.02 (1.01, 1.02) ***          |
| Season (Ref=Winter)                                |                                |                                |                                |
| Summer                                             | 0.97 (0.89, 1.06)              | 0.98 (0.90, 1.06)              | 0.97 (0.97, 0.98) ***          |
| SFU*Urbanicity                                     | -                              | <b>Ref=SFU*Urban</b>           | <b>Ref= SFU*Rural</b>          |
|                                                    |                                | 0.91 (0.91, 0.91) ***          | 1.11 (0.86, 1.44)              |

<sup>a</sup>Prevalence ratios (PRs) were adjusted for child age and sex, ECE, iodine intake, stunting, maternal age, maternal education, household wealth index, cooking place, and season. \* p<0.05, \*\* p<0.01, \*\*\* p<0.001.



**Table S7: Association between SFU and literacy-numeracy stratified by sex of the children**

| Predictors                                         | Overall<br>(Model I)           | Boy<br>(Model II)              | Girl<br>(Model III)            |
|----------------------------------------------------|--------------------------------|--------------------------------|--------------------------------|
|                                                    | Prevalence Ratios<br>(95 % CI) | Prevalence Ratios<br>(95 % CI) | Prevalence Ratios<br>(95 % CI) |
| <b>Unadjusted PRs (N=9395)</b>                     |                                |                                |                                |
| Solid Fuel Use (SFU)                               |                                |                                |                                |
| Exposed vs Unexposed                               | 1.23 (1.15, 1.31)***           | 1.23 (1.12, 1.34) ***          | 1.23 (1.12, 1.36) ***          |
| <b><sup>a</sup>Adjusted PRs (N=9202)</b>           |                                |                                |                                |
| Solid Fuel Use (SFU)                               |                                |                                |                                |
| Exposed vs Unexposed                               | 1.04 (0.95, 1.13)              | 1.04 (0.93, 1.16) ***          | 1.03 (0.92, 1.16)              |
| Sex of child                                       | (Ref=Boy)                      | (Ref=Boy)                      | (Ref=Girl)                     |
|                                                    | 0.96 (0.92, 1.01)              | 0.97 (0.86, 1.09)              | 1.03 (0.91, 1.17)              |
| Child age (in years)                               | 0.77 (0.73, 0.81) ***          | 0.77 (0.73, 0.81) ***          | 0.77 (0.73, 0.81) ***          |
| Ever attended ECE Program (Ref=No)                 |                                |                                |                                |
| Yes                                                | 0.61 (0.56, 0.66) ***          | 0.61 (0.56, 0.66) ***          | 0.61 (0.56, 0.66) ***          |
| Iodine Intake (Ref=No)                             |                                |                                |                                |
| Yes                                                | 0.95 (0.90, 1.01)              | 0.95 (0.90, 1.01)              | 0.95 (0.90, 1.01)              |
| Stunting (Ref=No)                                  |                                |                                |                                |
| Yes                                                | 1.08 (1.03, 1.14) **           | 1.08 (1.03, 1.14) *            | 1.08 (1.03, 1.14) **           |
| Maternal Age                                       | 1.00 (1.00, 1.01)              | 1.00 (1.00, 1.01)              | 1.00 (1.00, 1.01)              |
| Maternal Education Level (Ref=Pre-primary or none) |                                |                                |                                |
| Primary                                            | 0.97 (0.90, 1.05)              | 0.97 (0.90, 1.05)              | 0.97 (0.90, 1.05)              |
| Secondary                                          | 0.88 (0.81, 0.95) **           | 0.87 (0.81, 0.95) **           | 0.87 (0.81, 0.95) **           |
| Higher Secondary+                                  | 0.75 (0.67, 0.83) ***          | 0.75 (0.67, 0.83) ***          | 0.75 (0.67, 0.83) ***          |
| Household Wealth Quintiles (Ref=Poorest)           |                                |                                |                                |
| Poorer                                             | 0.97 (0.90, 1.05)              | 0.97 (0.90, 1.05)              | 0.97 (0.90, 1.05)              |
| Middle                                             | 0.94 (0.87, 1.02)              | 0.94 (0.87, 1.02)              | 0.94 (0.87, 1.02)              |
| Richer                                             | 0.90 (0.83, 0.98) *            | 0.90 (0.83, 0.98) *            | 0.90 (0.83, 0.98) *            |
| Richest                                            | 0.84 (0.76, 0.93) **           | 0.84 (0.76, 0.93) **           | 0.84 (0.76, 0.93) **           |
| Cooking Place (Ref= Main Room)                     |                                |                                |                                |
| Separate                                           | 1.00 (0.94, 1.06)              | 1.00 (0.94, 1.06)              | 1.00 (0.94, 1.06)              |
| Outdoor                                            | 0.99 (0.92, 1.06)              | 0.99 (0.92, 1.06)              | 0.99 (0.92, 1.06)              |
| Urbanicity (Ref=Rural)                             |                                |                                |                                |
| Urban                                              | 1.03 (0.96, 1.11)              | 1.03 (0.96, 1.11)              | 1.03 (0.96, 1.11)              |
| Season (Ref= Winter)                               |                                |                                |                                |
| Summer                                             | 1.02(0.97, 1.07)               | 1.02 (0.97, 1.07)              | 1.02 (0.97, 1.07)              |
| SFU*Sex                                            | -                              | <b>Ref=SFU*Girl</b>            | <b>Ref= SFU*Boy</b>            |
|                                                    |                                | 1.01 (0.88, 1.15)              | 0.99 (0.87, 1.13)              |

<sup>a</sup>Prevalence ratios (PRs) were adjusted for child age, ECE, iodine intake, stunting, maternal age, maternal education, household wealth index, cooking place, season, and urbanicity. \* p<0.05, \*\* p<0.01, \*\*\* p<0.001.

**Table S8: Association between SFU and literacy-numeracy stratified by urbanicity**

| Predictors                                         | Overall<br>(Model I)           | Rural<br>(Model II)            | Urban<br>(Model III)           |
|----------------------------------------------------|--------------------------------|--------------------------------|--------------------------------|
|                                                    | Prevalence Ratios<br>(95 % CI) | Prevalence Ratios<br>(95 % CI) | Prevalence Ratios<br>(95 % CI) |
| <b>Unadjusted PRs (N=9395)</b>                     |                                |                                |                                |
| Solid Fuel Use (SFU)                               |                                |                                |                                |
| Exposed vs Unexposed                               | 1.23 (1.15, 1.31)***           | 1.22 (1.09, 1.36)***           | 1.23 (1.10, 1.36)***           |
| <b><sup>a</sup>Adjusted PRs (N=9202)</b>           |                                |                                |                                |
| Solid Fuel Use (SFU)                               |                                |                                |                                |
| Exposed vs Unexposed                               | 1.04 (0.95, 1.13)              | 1.04 (0.93, 1.17)              | 1.03 (0.91, 1.16)              |
| Sex of child                                       | (Ref=Boy)                      | (Ref=Girl)                     | (Ref=Girl)                     |
|                                                    | 0.96 (0.92, 1.01)              | 1.04 (0.99, 1.09)              | 1.04 (0.99, 1.09)              |
| Child age (in years)                               | 0.77 (0.73, 0.81) ***          | 0.77 (0.73, 0.81) ***          | 0.77 (0.73, 0.81) ***          |
| Ever attended ECE Program (Ref=No)                 |                                |                                |                                |
| Yes                                                | 0.61 (0.56, 0.66) ***          | 0.61 (0.56, 0.66) ***          | 0.61 (0.56, 0.66) ***          |
| Iodine Intake (Ref=No)                             |                                |                                |                                |
| Yes                                                | 0.95 (0.90, 1.01)              | 0.95 (0.90, 1.01)              | 0.95 (0.90, 1.01)              |
| Stunting (Ref=No)                                  |                                |                                |                                |
| Yes                                                | 1.08 (1.03, 1.14) **           | 1.08 (1.03, 1.14) **           | 1.08 (1.03, 1.14) **           |
| Maternal Age                                       |                                |                                |                                |
|                                                    | 1.00 (1.00, 1.01)              | 1.00 (1.00, 1.01)              | 1.00 (1.00, 1.01)              |
| Maternal Education Level (Ref=Pre-primary or none) |                                |                                |                                |
| Primary                                            | 0.97 (0.90, 1.05)              | 0.97 (0.90, 1.05)              | 0.97 (0.90, 1.05)              |
| Secondary                                          | 0.88 (0.81, 0.95) **           | 0.88 (0.81, 0.95) **           | 0.88 (0.81, 0.95) **           |
| Higher Secondary+                                  | 0.75 (0.67, 0.83) ***          | 0.75 (0.67, 0.83) ***          | 0.75 (0.67, 0.83) ***          |
| Household Wealth Quintiles (Ref=Poorest)           |                                |                                |                                |
| Poorer                                             | 0.97 (0.90, 1.05)              | 0.97 (0.90, 1.05)              | 0.97 (0.90, 1.05)              |
| Middle                                             | 0.94 (0.87, 1.02)              | 0.94 (0.87, 1.02)              | 0.94 (0.87, 1.02)              |
| Richer                                             | 0.90 (0.83, 0.98) *            | 0.90 (0.83, 0.98) *            | 0.90 (0.83, 0.98) *            |
| Richest                                            | 0.84 (0.76, 0.93) **           | 0.84 (0.76, 0.93) **           | 0.84 (0.76, 0.93) **           |
| Cooking Place (Ref= Main Room)                     |                                |                                |                                |
| Separate                                           | 1.00 (0.94, 1.06)              | 1.00 (0.94, 1.06)              | 1.00 (0.94, 1.06)              |
| Outdoor                                            | 0.99 (0.92, 1.06)              | 0.99 (0.92, 1.06)              | 0.99 (0.92, 1.06)              |
| Urbanicity (Ref=Rural)                             |                                |                                |                                |
| Urban                                              | 1.03 (0.96, 1.11)              | 1.04 (0.91, 1.18)              | 0.96 (0.85-1.10)               |
| Season (Ref= Winter)                               |                                |                                |                                |
| Summer                                             | 1.02(0.97, 1.07)               | 1.02 (0.97, 1.07)              | 1.02 (0.97, 1.07)              |
| SFU*Urbanicity                                     | -                              | <b>Ref=SFU*Urban</b>           | <b>Ref= SFU*Rural</b>          |
|                                                    |                                | 1.01 (0.87, 1.18)              | 0.99 (0.85, 1.15)              |

<sup>a</sup>Prevalence ratios (PRs) were adjusted for child age, ECE, iodine intake, stunting, maternal age, maternal education, household wealth index, cooking place, and season. \* p<0.05, \*\* p<0.01, \*\*\* p<0.001.

**Table S9: Association between SFU and physical development stratified by sex of the children**

| Predictors                                         | Overall<br>(Model I)           | Boy<br>(Model II)              | Girl<br>(Model III)            |
|----------------------------------------------------|--------------------------------|--------------------------------|--------------------------------|
|                                                    | Prevalence Ratios<br>(95 % CI) | Prevalence Ratios<br>(95 % CI) | Prevalence Ratios<br>(95 % CI) |
| <b>Unadjusted PRs(N=9395)</b>                      |                                |                                |                                |
| Solid Fuel Use (SFU)                               |                                |                                |                                |
| Exposed vs Unexposed                               | 1.58 (0.48, 5.20)              | 1.10 (0.26, 4.55)              | 3.07 (0.31, 30.84)             |
| <b><sup>a</sup>Adjusted PRs (N=9202)</b>           |                                |                                |                                |
| Solid Fuel Use (SFU)                               |                                |                                |                                |
| Exposed vs Unexposed                               | 0.71 (0.32, 1.60)              | 0.34 (0.13, 0.88) *            | 2.23 (0.65, 7.66)              |
| Sex of child                                       | (Ref=Boy)                      | (Ref=Boy)                      | (Ref=Girl)                     |
|                                                    | 0.69 (0.45, 1.05)              | 0.39 (0.13, 1.19)              | 2.41 (0.69, 8.39)              |
| Child age (in years)                               | 0.53 (0.34, 0.84) **           | 0.77 (0.50, 1.19)              | 0.62 (0.40, 0.97) *            |
| Ever attended ECE Program (Ref=No)                 |                                |                                |                                |
| Yes                                                | 1.12 (0.62, 2.02)              | 0.97 (0.55, 1.73)              | 0.92 (0.50, 1.70)              |
| Iodine Intake (Ref=No)                             |                                |                                |                                |
| Yes                                                | 0.55 (0.34, 0.90) *            | 0.60 (0.37, 0.98) *            | 0.64 (0.40, 1.05)              |
| Stunting (Ref=No)                                  |                                |                                |                                |
| Yes                                                | 0.75 (0.46, 1.21)              | 0.70 (0.44, 1.14)              | 0.76 (0.47, 1.22)              |
| Maternal Age                                       | 0.96 (0.93, 1.00) *            | 0.94 (0.91, 0.98) **           | 0.98 (0.94, 1.02)              |
| Maternal Education Level (Ref=Pre-primary or none) |                                |                                |                                |
| Primary                                            | 0.56 (0.30, 1.05)              | 0.59 (0.31, 1.12)              | 0.58 (0.31, 1.09)              |
| Secondary                                          | 0.30 (0.15, 0.59) ***          | 0.38 (0.19, 0.75) **           | 0.39 (0.20, 0.77) **           |
| Higher Secondary+                                  | 0.49 (0.20, 1.17)              | 0.78 (0.33, 1.87)              | 0.48 (0.19, 1.21)              |
| Household Wealth Quintiles (Ref=Poorest)           |                                |                                |                                |
| Poorer                                             | 1.22 (0.61, 2.43)              | 0.87 (0.46, 1.66)              | 0.95 (0.49, 1.86)              |
| Middle                                             | 1.24 (0.61, 2.50)              | 0.76 (0.39, 1.47)              | 0.86 (0.43, 1.73)              |
| Richer                                             | 1.14 (0.50, 2.60)              | 0.55 (0.24, 1.22)              | 0.92 (0.41, 2.05)              |
| Richest                                            | 1.09 (0.41, 2.92)              | 0.44 (0.16, 1.17)              | 1.00 (0.38, 2.59)              |
| Cooking Place (Ref=Main Room)                      |                                |                                |                                |
| Separate                                           | 1.08 (0.62, 1.88)              | 1.11 (0.64, 1.93)              | 0.73 (0.42, 1.26)              |
| Outdoor                                            | 0.79 (0.43, 1.45)              | 0.78 (0.43, 1.43)              | 0.61 (0.34, 1.10)              |
| Urbanicity (Ref=Rural)                             |                                |                                |                                |
| Urban                                              | 0.73 (0.31, 1.72)              | 0.47 (0.18, 1.22)              | 0.44 (0.16, 1.27)              |
| Season (Ref=Winter)                                |                                |                                |                                |
| Summer                                             | 1.15 (0.64, 2.07)              | 1.22 (0.69, 2.16)              | 1.46 (0.79, 2.67)              |
| SFU*Sex                                            | -                              | <b>Ref=SFU*Girl</b>            | <b>Ref= SFU*Boy</b>            |
|                                                    |                                | 0.43 (0.11,1.60)               | 2.77 (0.84,9.17)               |

<sup>a</sup>Prevalence ratios (PRs) were adjusted for child age, ECE, iodine intake, stunting, maternal age, maternal education, household wealth index, cooking place, season, and urbanicity. \* p<0.05, \*\* p<0.01, \*\*\* p<0.001.)

**Table S10: Association between SFU and physical development stratified by urbanicity**

| Predictors                                         | Overall<br>(Model I)           | Rural<br>(Model II)            | Urban<br>(Model III)           |
|----------------------------------------------------|--------------------------------|--------------------------------|--------------------------------|
|                                                    | Prevalence Ratios<br>(95 % CI) | Prevalence Ratios<br>(95 % CI) | Prevalence Ratios<br>(95 % CI) |
| <b>Unadjusted PRs (N=9395)</b>                     |                                |                                |                                |
| Solid Fuel Use (SFU)                               |                                |                                |                                |
| Exposed vs Unexposed                               | 1.58 (0.48, 5.20)              | 1.38 (0.22, 8.41)              | 1.67 (0.24, 11.74)             |
| <b><sup>a</sup>Adjusted PRs (N=9202)</b>           |                                |                                |                                |
| Solid Fuel Use (SFU)                               |                                |                                |                                |
| Exposed vs Unexposed                               | 0.71 (0.32, 1.60)              | 0.75 (0.30, 1.91)              | 0.94 (0.28, 3.19)              |
| Sex of child                                       | (Ref=Boy)                      | (Ref=Girl)                     | (Ref=Girl)                     |
|                                                    | 0.69 (0.45, 1.05) *            | 0.71 (0.47, 1.09)              | 0.99 (0.66, 1.48)              |
| Child age (in years)                               | 0.53 (0.34, 0.84) ***          | 0.57 (0.37, 0.89) *            | 1.10 (0.72, 1.66)              |
| Ever attended ECE Program (Ref=No)                 |                                |                                |                                |
| Yes                                                | 1.12 (0.62, 2.02)              | 1.08 (0.60, 1.93)              | 0.64 (0.36, 1.16)              |
| Iodine Intake (Ref=No)                             |                                |                                |                                |
| Yes                                                | 0.55 (0.34, 0.90) **           | 0.43 (0.27, 0.69) **           | 0.72 (0.45, 1.15)              |
| Stunting (Ref=No)                                  |                                |                                |                                |
| Yes                                                | 0.75 (0.46, 1.21)              | 0.64 (0.39, 1.04)              | 0.63 (0.39, 1.01)              |
| Maternal Age                                       | 0.96 (0.93, 1.00) **           | 0.94 (0.91, 0.98) **           | 0.98 (0.94, 1.02)              |
| Maternal Education Level (Ref=Pre-primary or none) |                                |                                |                                |
| Primary                                            | 0.56 (0.30, 1.05)              | 0.45 (0.24, 0.83) *            | 0.86 (0.46, 1.61)              |
| Secondary                                          | 0.30 (0.15, 0.59) ***          | 0.23 (0.12, 0.45) ***          | 0.68 (0.35, 1.32)              |
| Higher Secondary+                                  | 0.49 (0.20, 1.17)              | 0.51 (0.22, 1.19)              | 1.17 (0.49, 2.80)              |
| Household Wealth Quintiles (Ref=Poorest)           |                                |                                |                                |
| Poorer                                             | 1.22 (0.61, 2.43)              | 1.05 (0.55, 2.01)              | 0.63 (0.35, 1.15)              |
| Middle                                             | 1.24 (0.61, 2.50)              | 0.87 (0.44, 1.74)              | 0.43 (0.22, 0.82) *            |
| Richer                                             | 1.14 (0.50, 2.60)              | 1.00 (0.46, 2.19)              | 0.29 (0.13, 0.64) **           |
| Richest                                            | 1.09 (0.41, 2.92) *            | 0.79 (0.30, 2.07)              | 0.29 (0.33, 0.75) *            |
| Cooking Place (Ref= Main Room)                     |                                |                                |                                |
| Separate                                           | 1.08 (0.62, 1.88)              | 0.97 (0.57, 1.67)              | 0.94 (0.56, 1.59)              |
| Outdoor                                            | 0.79 (0.43, 1.45)              | 0.71 (0.39, 1.29)              | 0.63 (0.35, 1.13)              |
| Urbanicity (Ref=Rural)                             |                                |                                |                                |
| Urban                                              | 0.73 (0.31, 1.72)              | 0.66 (0.20, 2.24)              | 0.54 (0.14, 2.15)              |
| Season (Ref= Winter)                               |                                |                                |                                |
| Summer                                             | 1.15 (0.64, 2.07)              | 1.28 (0.75, 2.20)              | 1.24 (0.73, 2.11)              |
| SFU*Urbanicity                                     | -                              | <b>Ref=SFU*Urban</b>           | <b>Ref= SFU*Rural</b>          |
|                                                    |                                | 1.60 (0.33,7.73)               | 0.91 (0.19,4.22)               |

<sup>a</sup>Prevalence ratios (PRs) were adjusted for child age, sex, ECE, iodine intake, stunting, maternal age, maternal education, household wealth index, cooking place, and season. \* p<0.05, \*\* p<0.01, \*\*\* p<0.001.)

**Table S11: Levels of HAP Exposure and ECD Outcomes by Sex of the Children**

| ECD Outcomes                | Levels of HAP Exposure           | Sex   | Unadjusted PRs<br>N=9395<br>(95% CI) | P-value | Adjusted PRs<br>N=9202<br>(95% CI) <sup>a</sup> | P-value/<br>P-int | P-trend |
|-----------------------------|----------------------------------|-------|--------------------------------------|---------|-------------------------------------------------|-------------------|---------|
| ECDI                        | Moderately Exposed vs. Unexposed | All   | 1.64 (1.44, 1.87)                    | <0.001  | 1.39, (1.18, 1.63)                              | <0.001            | <0.001  |
| ECDI                        | Highly Exposed vs. Unexposed     | All   | 1.72 (1.48, 2.00)                    | <0.001  | 1.47, (1.24, 1.75)                              | <0.001            |         |
| ECDI                        | Moderately Exposed vs. Unexposed | Boys  | 1.52 (1.29, 1.79)                    | <0.001  | 1.30 (1.08, 1.57)                               | P-int >0.05       | 0.039   |
| ECDI                        | Highly Exposed vs. Unexposed     | Boys  | 1.54 (1.27, 1.86)                    | <0.001  | 1.33 (1.08, 1.65)                               |                   |         |
| ECDI                        | Moderately Exposed vs. Unexposed | Girls | 1.88 (1.52, 2.33)                    | <0.001  | 1.54 (1.22, 1.94)                               | P-int >0.05       | <0.001  |
| ECDI                        | Highly Exposed vs. Unexposed     | Girls | 2.08 (1.64, 2.64)                    | <0.001  | 1.71 (1.32, 2.20)                               |                   |         |
| Learning-Cognition          | Moderately Exposed vs. Unexposed | All   | 1.84 (1.40, 2.44)                    | <0.001  | 1.59 (1.16, 2.16)                               | 0.004             | <0.001  |
| Learning-Cognition          | Highly Exposed vs. Unexposed     | All   | 2.41 (1.77, 3.29)                    | <0.001  | 1.97 (1.42, 2.74)                               |                   |         |
| Learning-Cognition          | Moderately Exposed vs. Unexposed | Boys  | 2.95 (2.94, 2.95)                    | <0.001  | 1.70 (1.16, 2.48)                               | P-int >0.05       | 0.001   |
| Learning-Cognition          | Highly Exposed vs. Unexposed     | Boys  | 3.63 (3.63, 3.64)                    | <0.001  | 1.96 (1.31, 2.95)                               |                   |         |
| Learning-Cognition          | Moderately Exposed vs. Unexposed | Girls | 1.97 (1.30, 3.00)                    | 0.001   | 1.67 (1.10, 2.55)                               | P-int >0.05       | <0.001  |
| Learning-Cognition          | Highly Exposed vs. Unexposed     | Girls | 2.85 (1.81, 4.50)                    | <0.001  | 2.31 (1.48, 3.60)                               |                   |         |
| Socio-emotional Development | Moderately Exposed vs. Unexposed | All   | 1.25 (1.11, 1.40)                    | <0.001  | 1.20 (1.04, 1.39)                               | 0.015             | 0.760   |
| Socio-emotional Development | Moderately Exposed vs. Unexposed | All   | 1.14 (0.99, 1.31)                    | 0.068   | 1.10 (0.93, 1.29)                               |                   |         |
| Socio-emotional Development | Moderately Exposed vs. Unexposed | Boys  | 1.24 (1.07, 1.44)                    | 0.004   | 1.19 (1.00, 1.42)                               | P-int >0.05       | 0.661   |

|                             |                                  |       |                    |        |                    |             |       |
|-----------------------------|----------------------------------|-------|--------------------|--------|--------------------|-------------|-------|
| Socio-emotional Development | Highly Exposed vs. Unexposed     | Boys  | 1.16 (0.97, 1.38)  | 0.115  | 1.11 (0.91, 1.35)  |             |       |
| Socio-emotional Development | Highly Exposed vs. Unexposed     | Girls | 1.26 (1.06, 1.50)  | 0.010  | 1.19 (0.98, 1.46)  | P-int >0.05 | 0.967 |
| Socio-emotional Development | Highly Exposed vs. Unexposed     | Girls | 1.13 (0.91, 1.40)  | 0.262  | 1.07 (0.84, 1.36)  |             |       |
| Literacy-Numeracy           | Moderately Exposed vs. Unexposed | All   | 1.23 (1.15, 1.32)  | <0.001 | 1.03 (0.95, 1.13)  | 0.456       | 0.588 |
| Literacy-Numeracy           | Highly Exposed vs. Unexposed     | All   | 1.23 (1.13, 1.33)  | <0.001 | 1.03 (0.94, 1.14)  | 0.494       |       |
| Literacy-Numeracy           | Moderately Exposed vs. Unexposed | Boys  | 1.23 (1.12, 1.35)  | <0.001 | 1.04 (0.93, 1.16)  | P-int >0.05 | 0.764 |
| Literacy-Numeracy           | Highly Exposed vs. Unexposed     | Boys  | 1.22 (1.09, 1.37)  | <0.001 | 1.03 (0.91, 1.16)  |             |       |
| Literacy-Numeracy           | Moderately Exposed vs. Unexposed | Girls | 1.23 (1.12, 1.36)  | <0.001 | 1.03 (0.92, 1.15)  | P-int >0.05 | 0.605 |
| Literacy-Numeracy           | Highly Exposed vs. Unexposed     | Girls | 1.23 (1.10, 1.39)  | <0.001 | 1.04 (0.91, 1.19)  |             |       |
| Physical Development        | Moderately Exposed vs. Unexposed | All   | 1.58 (0.47, 5.33)  | 0.461  | 0.62 (0.19, 2.02)  | 0.428       | 0.519 |
| Physical Development        | Highly Exposed vs. Unexposed     | All   | 1.56 (0.38, 6.49)  | 0.539  | 0.48 (0.12, 1.85)  | 0.284       |       |
| Physical Development        | Moderately Exposed vs. Unexposed | Boys  | 1.18 (0.27, 5.11)  | 0.825  | 2.93 (0.24, 36.44) | P-int >0.05 | 0.910 |
| Physical Development        | Highly Exposed vs. Unexposed     | Boys  | 0.83 (0.12, 5.74)  | 0.847  | 6.93 (0.49, 96.98) |             |       |
| Physical Development        | Moderately Exposed vs. Unexposed | Girls | 2.87 (0.29, 28.72) | 0.371  | 0.24 (0.04, 1.37)  | P-int >0.05 | 0.776 |
| Physical Development        | Highly Exposed vs. Unexposed     | Girls | 3.85 (0.33, 45.07) | 0.282  | 0.71 (0.12, 4.15)  |             |       |

<sup>a</sup>Prevalence ratios (PRs) were adjusted for child age, ECE, iodine intake, stunting, maternal age, maternal education, household wealth index, urbanicity, and season. CI-Confidence Intervals; \* p<0.05, \*\* p<0.01, \*\*\* p<0.001.

**Table S12: Levels of HAP Exposure and ECD Outcomes by Urbanicity**

| <b>ECD Outcomes</b>         | <b>Levels of HAP Exposure</b>    | <b>Urbanicity</b> | <b>Unadjusted PRs<br/>N=9395<br/>(95% CI)</b> | <b>P-value</b> | <b>Adjusted PRs<br/>N=9202<br/>(95% CI)<sup>a</sup></b> | <b>P-value/<br/>P-int</b> | <b>P-trend</b> |
|-----------------------------|----------------------------------|-------------------|-----------------------------------------------|----------------|---------------------------------------------------------|---------------------------|----------------|
| ECDI                        | Moderately Exposed vs. Unexposed | All               | 1.64 (1.44, 1.87)                             | <0.001         | 1.39 (1.18, 1.63)                                       | <0.001                    | <0.001         |
| ECDI                        | Highly Exposed vs. Unexposed     | All               | 1.72 (1.48, 2.00)                             | <0.001         | 1.47 (1.24, 1.75)                                       | <0.001                    |                |
| ECDI                        | Moderately Exposed vs. Unexposed | Rural             | 1.60 (1.29, 1.97)                             | <0.001         | 1.32 (1.06, 1.63)                                       | P-int >0.05               | 0.011          |
| ECDI                        | Highly Exposed vs. Unexposed     | Rural             | 1.68 (1.34, 2.37)                             | <0.001         | 1.41 (1.12, 1.77)                                       |                           |                |
| ECDI                        | Moderately Exposed vs. Unexposed | Urban             | 1.81 (1.46, 2.25)                             | <0.001         | 1.48 (1.18, 1.86)                                       | P-int >0.05               | 0.002          |
| ECDI                        | Highly Exposed vs. Unexposed     | Urban             | 1.78 (1.34, 2.37)                             | <0.001         | 1.48 (1.11, 1.99)                                       |                           |                |
| Learning-Cognition          | Moderately Exposed vs. Unexposed | All               | 1.84 (1.40, 2.44)                             | <0.001         | 1.59 (1.16, 2.16)                                       | 0.004                     | <0.001         |
| Learning-Cognition          | Highly Exposed vs. Unexposed     | All               | 2.41 (1.77, 3.29)                             | <0.001         | 1.97 (1.42, 2.4)                                        | <0.001                    |                |
| Learning-Cognition          | Moderately Exposed vs. Unexposed | Rural             | 1.78 (1.19, 2.66)                             | 0.005          | 1.49 (0.98, 2.25)                                       | P-int >0.05               | 0.003          |
| Learning-Cognition          | Highly Exposed vs. Unexposed     | Rural             | 2.22 (1.46, 3.39)                             | <0.001         | 1.85 (1.20, 2.85)                                       |                           |                |
| Learning-Cognition          | Moderately Exposed vs. Unexposed | Urban             | 2.14 (1.36, 3.36)                             | 0.001          | 1.82 (1.17, 2.84)                                       | P-int >0.05               | 0.001          |
| Learning-Cognition          | Highly Exposed vs. Unexposed     | Urban             | 2.78 (1.60, 4.83)                             | <0.001         | 2.37 (1.42, 3.94)                                       |                           |                |
| Socio-emotional Development | Moderately Exposed vs. Unexposed | All               | 1.25 (1.11, 1.40)                             | <0.001         | 1.20 (1.04, 1.39)                                       | 0.015                     | 0.760          |
| Socio-emotional Development | Moderately Exposed vs. Unexposed | All               | 1.14 (0.99, 1.31)                             | 0.068          | 1.10 (0.93, 1.29)                                       | 0.259                     |                |
| Socio-emotional Development | Moderately Exposed vs. Unexposed | Rural             | 1.18 (0.99, 1.41)                             | 0.0065         | 1.14 (0.94, 1.37)                                       | P-int >0.05               | 0.757          |

|                             |                                  |       |                   |        |                   |             |       |
|-----------------------------|----------------------------------|-------|-------------------|--------|-------------------|-------------|-------|
| Socio-emotional Development | Highly Exposed vs. Unexposed     | Rural | 1.10 (0.90, 1.34) | 0.360  | 1.05 (0.86, 1.29) |             |       |
| Socio-emotional Development | Highly Exposed vs. Unexposed     | Urban | 1.40 (1.15, 1.71) | 0.001  | 1.30 (1.05, 1.60) | P-int >0.05 | 0.237 |
| Socio-emotional Development | Highly Exposed vs. Unexposed     | Urban | 1.16 (0.86, 1.32) | 0.558  | 1.09 (0.81, 1.47) |             |       |
| Literacy-Numeracy           | Moderately Exposed vs. Unexposed | All   | 1.23 (1.15, 1.32) | <0.001 | 1.03 (0.95, 1.13) | 0.456       | 0.588 |
| Literacy-Numeracy           | Highly Exposed vs. Unexposed     | All   | 1.23 (1.13, 1.33) | <0.001 | 1.03 (0.94, 1.14) | 0.494       |       |
| Literacy-Numeracy           | Moderately Exposed vs. Unexposed | Rural | 1.23 (1.10, 1.37) | <0.001 | 1.04 (0.93, 1.17) | P-int >0.05 | 0.772 |
| Literacy-Numeracy           | Highly Exposed vs. Unexposed     | Rural | 1.22 (1.08, 1.37) | 0.001  | 1.03 (0.91, 1.17) |             |       |
| Literacy-Numeracy           | Moderately Exposed vs. Unexposed | Urban | 1.20 (1.06, 1.36) | 0.003  | 1.01 (0.89, 1.26) | P-int >0.05 | 0.565 |
| Literacy-Numeracy           | Highly Exposed vs. Unexposed     | Urban | 1.25 (1.06, 1.47) | 0.007  | 1.06 (0.89, 1.26) |             |       |
| Physical Development        | Moderately Exposed vs. Unexposed | All   | 1.58 (0.47, 5.33) | 0.461  | 0.62 (0.19, 2.02) | 0.428       | 0.519 |
| Physical Development        | Highly Exposed vs. Unexposed     | All   | 1.56 (0.38, 6.49) | 0.539  | 0.48 (0.12, 1.85) | 0.284       |       |
| Physical Development        | Moderately Exposed vs. Unexposed | Rural | 1.39 (0.22, 8.64) | 0.722  | 1.23 (0.44, 3.44) | P-int >0.05 | 0.855 |
| Physical Development        | Highly Exposed vs. Unexposed     | Rural | 1.32 (0.18, 9.74) | 0.788  | 0.97 (0.31, 3.01) |             |       |
| Physical Development        | Moderately Exposed vs. Unexposed | Urban | 1.51(0.17, 13.38) | 0.713  | 0.58 (0.14, 2.42) | P-int >0.05 | 0.493 |
| Physical Development        | Highly Exposed vs. Unexposed     | Urban | 2.05(0.15, 12.14) | 0.847  | 0.70 (0.11, 4.27) |             |       |

<sup>a</sup>Prevalence ratios (PRs) were adjusted for child age, sex, ECE, iodine intake, stunting, maternal age, maternal education, household wealth index, and season. CI-Confidence Intervals; \* p<0.05, \*\* p<0.01, \*\*\* p<0.001.
